# Supplementary material for: Systems Approaches to Predict the Functions of Glycoside Hydrolases during the Life Cycle of Aspergillus niger Using Developmental Mutants ∆brlA and ∆flbA
Source: PLoS One. 2015 Jan 28;10(1):e0116269. doi: 10.1371/journal.pone.0116269 (PMC4309609; doi:10.1371/journal.pone.0116269)
Supplement: S1 Table — Mean gene expression levels of all analyzed genes encoding CAZymes, given as % of actA during exponential growth. (XLSX) [file pone.0116269.s001.xlsx]

## Sheet: Table S1
	wild-type				ΔflbA				ΔbrlA
ORF	Expa	Day 1	Day 3	Day 6	Exp	Day 1	Day 3	Day 6	Exp	Day 1	Day 3	Day 6	SPb	GPIc	CAZy family
An03g06550	268.328	91.6554	17.233	10.1775	183.498	98.7645	2.55501	3.85702	154.897	41.8247	7.24327	1.93738	1	0	GH15-CBM20
An11g03340	31.0704	2.63634	1.42959	0.577335	13.4242	3.31428	0.406104	0.402967	12.989	1.7719	0.714641	0.229525	1	0	GH13
An02g10550	0.743925	48.3737	119.5	95.0269	0.786696	67.5348	50.9932	36.3067	1.67551	34.8752	26.4955	12.3609	1	0	GH43
An04g06920	161.151	26.7055	17.8804	8.2455	100.584	17.0731	3.42089	3.80493	90.4389	29.2754	32.3551	8.57993	1	0	GH31
An01g11010	17.9812	87.8323	57.28	38.8619	10.1585	24.4546	12.4043	6.98402	7.99521	12.0376	6.21961	1.50955	1	1	GH16
An03g05290	33.7255	24.3095	18.1737	13.0679	30.2571	19.8932	8.64991	5.2239	3.76777	0.901369	1.04995	0.892254	1	1	GH17
An15g02300	0.388067	0.649964	0.571543	0.706034	0.443979	1.46241	0.333826	0.32205	0.39281	0.463414	0.370015	0.304621	1	0	GH54-CBM42
An18g03570	2.64573	47.0977	67.1123	75.2342	5.15901	21.589	3.80759	3.04558	5.45707	41.4819	32.0908	12.6007	1	0	GH3
An09g00670	45.4335	71.6907	57.3467	66.4987	52.6814	62.4979	29.9104	18.4643	22.9137	34.5583	24.2965	11.9178	1	1	GH72-CBM43
An01g12450	7.12111	28.0178	23.7072	36.1984	2.91801	21.1102	3.6412	1.21392	3.46595	10.5665	6.30807	2.52789	1	0	GH55
An06g00170	0.392188	18.6231	14.437	10.787	0.356635	11.4407	4.03442	2.5845	0.377693	8.27407	5.18661	3.47595	1	0	GH27-CBM13
An04g08730	4.91248	18.7474	18.2252	16.1668	2.66356	19.4449	12.5291	16.1152	1.9673	8.43031	9.31506	7.29225	1	0	GH125
An09g02240	0.832487	63.6363	50.7253	49.7252	1.5113	7.95939	10.1755	3.71727	1.38664	38.3185	34.9111	17.7043	1	0	GH20
An03g00500	1.94382	1.94132	2.92331	2.90504	4.35295	24.3778	15.4268	19.7495	3.91304	2.12996	2.87683	3.41626	1	0	GH30
An01g12550	0.799232	95.8262	85.7548	55.5238	0.524459	101.265	108.474	65.8767	0.612981	50.3096	62.3765	42.4182	1	0	GH47
An03g05530	3.75946	2.79894	3.23809	2.03657	18.5607	8.17073	4.41865	3.60755	5.12929	1.81126	1.35244	1.03843	1	0	GH12
An16g06800	2.78871	1.81146	2.58559	2.5605	27.903	5.4874	2.34971	2.17141	2.74114	1.15503	1.66535	1.9729	1	0	GH5-CBM1
An11g01540	0.926344	1.93674	0.992333	0.548074	2.06599	0.767769	0.577334	0.708573	1.65013	0.873007	1.06869	0.700034	1	1	GH16
An01g10930	44.4676	38.8718	35.9183	18.678	22.1488	31.5049	18.9828	14.7815	26.9038	44.4331	39.4285	22.0165	1	0	GH31
An01g04560	0.935938	7.87717	19.1712	26.9741	1.31822	22.0367	7.26475	1.25199	1.21523	6.73331	5.43307	4.60198	1	0	GH16
An08g03060	0.282931	8.45093	4.98433	5.04508	0.262568	2.87494	1.95203	1.12474	0.359567	2.72398	3.00689	2.42522	1	0	GH92
An02g11150	1.50513	13.5536	4.6664	4.038	0.945269	5.48397	4.68536	2.79216	1.20538	5.32154	3.19973	1.68179	1	0	GH27
An09g02160	0.29583	5.5223	3.34117	2.79848	0.27916	20.5318	15.3343	8.25955	0.277872	2.26662	1.18006	1.70631	1	0	CE12
An12g08280	0.959684	0.602729	0.807621	0.648826	0.708726	0.434384	0.403756	0.43842	0.812222	0.496488	0.426323	0.393439	1	0	GH32
An14g04240	0.244418	4.92276	3.12	1.86829	0.262032	4.25169	1.72005	0.587208	0.224031	1.93095	2.31722	1.54236	1	0	GH92
An08g10780	0.41365	1.70293	0.445912	0.450751	0.437184	0.857178	0.489688	0.477159	0.413736	0.437594	0.672646	1.14088	1	0	GH43-CBM35
An03g04190	13.25	8.75996	3.69973	1.55886	21.8656	24.8919	2.78929	1.58868	6.53408	4.04748	2.32736	2.35845	1	0	EXPN-CBM63
An02g07020	1.30417	69.5989	75.8882	83.9	2.63884	79.1961	91.0468	57.7473	1.98396	37.9384	73.1512	73.6123	0	0	GH18
An04g06930	5.99278	2.77466	3.87999	1.8282	7.41216	0.781226	0.614259	0.445634	5.96246	3.31253	3.12858	1.33075	1	0	GH13
An01g01540	5.42551	7.54423	6.68619	7.43672	4.06796	4.18389	3.42023	3.5018	3.26228	5.92547	5.71322	3.41346	1	0	GH65
An08g05230	0.500062	1.9939	12.1346	9.29393	0.630393	5.15778	1.09578	0.622606	0.368869	1.17972	1.25802	0.632616	1	0	GH61
An03g00960	0.405582	2.055	8.74624	7.55907	0.418671	2.26009	6.55272	17.9492	0.401947	5.06454	1.86971	0.456437	1	0	GH62
An15g05370	0.287497	0.554268	0.736772	0.78006	6.66914	3.57934	0.907162	0.508221	0.331224	0.735641	0.392578	0.299577	1	0	GH28
An07g09330	0.296227	0.482049	1.9702	0.652219	0.33546	2.4886	0.448756	0.412124	0.298069	0.678207	0.665098	0.712656	1	0	GH7
An08g08370	0.325646	34.1313	31.2642	39.9887	0.301135	8.31492	3.22555	5.12199	0.328166	9.04994	20.4875	30.965	1	0	GH92
An03g01050	0.359251	1.27994	0.835823	0.674728	0.363839	0.624811	0.60781	0.622104	0.349837	0.885457	1.05106	4.56275	1	0	GH5
An01g00330	0.235646	0.250788	0.226689	0.222419	0.261939	0.314556	0.292598	0.29653	0.284646	0.306589	0.245428	0.241145	1	0	GH51
An11g06540	0.990178	0.84628	0.518433	0.499971	0.770234	0.653994	0.413294	0.449721	0.485568	0.603513	0.476744	0.485645	1	0	GH2
An09g01190	0.842192	2.49538	1.53149	1.07918	0.802251	19.8875	21.4286	13.2393	0.737951	1.37854	1.06834	2.25513	1	0	GH43
An14g01800	0.277124	0.984838	0.629661	0.458842	0.298393	1.18073	0.759541	0.471166	0.317348	0.387345	0.34375	0.303953	1	0	GH27
An14g01790	0.410105	1.34818	0.764615	0.536124	0.356081	0.89305	0.597251	0.467182	0.308568	0.557156	0.359026	0.259124	0	0	CBM35
An01g09960	0.247623	0.33	0.266914	0.293083	0.242893	0.348433	0.300519	0.318126	0.200794	0.303875	0.266282	0.230155	1	0	GH3
An18g04100	0.553173	3.34221	12.6212	14.5876	0.615049	1.11641	0.871674	0.66224	0.495894	5.60002	3.73535	1.35912	1	0	GH28
An07g08640	0.352176	29.5121	25.9035	5.96441	0.343978	51.9836	36.2804	51.2213	0.307796	8.3002	10.3461	7.58594	1	A	GH71
An14g02670	0.632877	1.33109	6.41343	3.26487	0.802468	3.22952	0.868378	0.833484	0.645193	0.941354	0.949762	0.583367	1	0	GH61-CBM1
An01g03090	0.926921	29.8598	51.0386	52.691	1.15173	19.469	18.897	9.33943	0.995071	16.647	39.7767	40.0615	1	0	GH81
An01g14600	0.58525	0.649076	1.27296	1.12585	0.608075	0.690359	0.490261	0.445924	0.537857	1.31342	0.780675	0.52991	1	0	GH11
An07g07700	1.26138	27.3138	32.6019	24.4031	1.34182	29.0902	27.7338	20.7296	1.13348	17.1793	15.9861	12.7486	1	0	GH76
An01g03340	0.749315	0.708949	0.771469	0.792239	1.11043	1.40924	1.41619	1.01408	0.690911	0.66845	0.931793	0.978724	1	0	GH12
An10g00400	9.94236	15.6621	42.6664	42.1138	9.81424	3.38298	2.11882	1.26491	23.2685	15.715	15.7529	5.24855	1	1	GH72
An04g09650	0.252648	0.485612	0.303766	0.34053	0.230815	0.486169	0.29211	0.424496	0.234809	0.250226	0.264264	0.248018	1	1	GH76
An01g12150	1.61976	10.769	2.87949	2.14233	1.24627	8.88773	1.21931	0.60297	1.01142	7.39353	1.77487	1.00573	1	0	GH35
An14g03520	2.6751	5.94023	5.20285	5.33646	4.89455	7.37301	9.13082	11.1651	4.68525	4.60786	5.66622	6.4043	1	1	GH76
An02g13580	0.40239	0.806686	19.3956	38.9255	0.34119	1.10546	0.76587	0.563137	0.233326	0.85598	0.346999	0.233719	1	0	GH18-CBM18
An01g01920	0.463676	1.81542	1.23243	1.73104	0.446125	0.751631	0.415211	0.404707	0.408735	0.47189	0.380397	0.339055	1	0	GH20
An02g13180	0.292315	3.19563	1.7588	2.42421	0.27775	1.79571	0.669905	0.258529	0.342309	1.51189	0.936404	0.364798	1	0	GH55
An01g11660	0.32242	0.346093	0.413439	0.404314	0.379904	3.16618	1.30299	0.338343	0.264118	0.299658	0.361417	0.27065	1	0	GH7-CBM1
An08g07350	13.3031	7.89841	4.91025	3.785	16.7686	9.1199	3.78628	3.16632	8.26736	3.78876	2.64764	2.40677	1	1	GH72
An02g04900	2.47704	0.690663	0.503567	0.516694	8.50534	1.11556	0.572857	0.606109	10.4293	1.26754	0.629423	0.432657	1	0	GH28
An11g00200	0.414416	1.08922	2.56672	1.54924	0.483123	0.744221	0.935737	1.55338	0.394076	6.49264	1.56883	1.00386	1	0	GH3
An07g07530	4.37542	3.26765	3.59232	4.26017	21.1278	8.07312	7.74954	7.34214	4.8406	2.33692	6.81615	5.94517	1	1	CBM18-GH16
An16g07040	48.7298	36.0855	39.8947	30.7356	59.9391	30.5908	11.2426	8.80674	48.0058	24.6704	14.1534	4.13973	1	0	GH17
An09g00260	6.5084	0.840642	0.439429	0.421888	2.28585	3.01643	1.63142	0.800928	1.37548	0.352219	0.337751	0.488204	1	0	GH36
An09g03260	0.635154	0.442978	0.998098	1.26527	0.606515	0.620281	0.591065	0.634212	0.583892	0.735176	0.721339	0.863941	1	0	GH28
An11g06080	0.262578	3.02157	1.52408	1.00955	0.4059	2.00691	1.29297	0.883172	0.503004	1.8035	3.05391	4.21788	1	0	GH3
An08g03580	0.589989	0.738982	1.23402	1.71585	0.72133	0.770017	0.585824	0.480446	0.931545	2.94319	1.80506	2.13218	1	0	GH17
An03g00940	0.416179	0.395775	2.68967	5.07045	0.382232	0.355416	0.72887	7.04512	0.336335	1.51274	1.96212	0.538244	1	0	GH10
An13g01260	0.44239	0.509701	0.469846	0.501368	0.436447	0.477954	0.450701	0.492005	0.339546	0.543917	0.657261	0.675502	1	0	GH92
An14g05340	0.239277	0.253549	6.98926	8.65905	0.238354	0.224078	0.213636	0.240171	0.233717	0.242715	0.245473	0.239023	1	0	GH105
An02g00850	1.19688	2.19101	5.64696	9.84617	1.3229	1.40981	1.01616	0.936339	1.10247	1.18521	1.05056	1.00613	1	1	GH16
An03g06310	0.412032	0.390964	0.40544	0.365036	0.537425	0.493333	0.373915	0.370381	0.387859	0.335102	0.358195	0.332489	1	0	CE8
An02g11890	0.313841	0.610589	0.617545	0.812637	0.296882	0.271694	0.29965	0.295462	0.237841	0.42495	0.682172	0.799552	1	0	GH79
An13g02110	0.251413	0.314657	0.245978	0.233302	0.302127	0.402623	0.294031	0.313652	0.298907	0.37635	0.308805	0.297644	0	0	GH29
An01g00780	0.511348	0.467034	0.743927	0.644497	0.539626	0.600435	0.639013	0.489326	0.719197	0.468113	0.333574	0.2701	1	0	GH11
An14g02760	0.309543	0.25718	0.261571	0.285744	0.290428	0.51774	0.283711	0.261124	0.280038	0.219531	0.257565	0.255283	1	0	GH12
An03g02960	0.375105	0.381976	0.363564	0.403457	0.359169	0.293407	0.272158	0.240791	0.427526	0.342282	0.360286	0.324812	1	0	GH20
An04g09360	0.504299	1.11416	1.08803	1.14212	0.480265	1.29143	1.59931	1.57165	0.419885	1.44888	1.56681	1.88425	1	0	CE12
An09g06400	33.1022	9.47277	6.80157	5.51536	3.44038	0.938035	0.407856	0.500746	16.2634	3.78236	1.632	0.608924	1	1	GH18
An15g03550	0.432096	0.387485	0.766489	0.846832	0.394733	2.02294	0.696403	0.54715	0.361924	0.616823	0.497134	0.339407	1	0	GH43
An14g04200	0.280549	0.373384	0.522785	0.402607	0.343787	0.8323	0.62225	0.654288	0.323429	0.333984	0.288312	0.245781	1	0	GH28
An14g01620	0.295858	0.349999	0.35732	0.304194	0.311366	0.355461	0.367734	0.379969	0.336164	0.339515	0.429675	0.41234	1	0	GH79
An09g05920	0.281986	0.430791	11.0129	36.9743	0.308329	0.36831	0.419761	0.439423	0.286574	0.548631	0.491315	0.59082	1	0	GH18
An05g01320	0.464794	0.38634	0.381574	0.364387	1.01484	0.854409	0.781297	0.921691	0.728616	0.863128	0.751866	1.03491	1	0	GH5
An02g09050	0.581854	0.606938	2.31209	5.45948	0.798304	0.72947	0.545128	0.560373	0.709833	0.784686	0.74547	0.635645	1	1	GH72
An01g10350	1.36733	0.549215	0.456042	0.536247	0.525307	0.569861	0.565248	0.617505	0.673963	0.854115	1.03539	0.873305	1	0	GH35
An03g05380	0.844134	0.814264	0.816174	0.802295	0.932182	3.29447	1.47414	1.0928	1.03776	1.34171	0.933901	0.363195	1	0	GH12
An11g03120	0.642331	10.4673	8.56758	5.56134	0.536947	11.6165	12.6619	9.25737	0.499478	11.4342	8.19825	4.82736	1	0	GH43
An08g01900	0.288844	0.344277	0.306194	0.253403	0.294333	0.281016	0.283748	0.275999	0.286729	0.333027	0.306267	0.267995	1	0	GH43
An16g06990	0.349166	0.283384	0.24926	0.274076	0.371002	0.266696	0.384007	0.384599	0.493573	0.677403	0.377111	0.376497	1	A	GH28
An08g09610	22.3796	21.0486	21.8336	16.2226	7.38202	4.61678	4.72607	1.93244	38.4322	31.9353	24.1925	12.4376	1	0	GH71
An13g02510	1.39175	0.898551	0.901993	0.845892	1.10787	0.894987	1.0537	1.26433	2.23707	1.07664	1.15262	1.11189	1	1	GH16
An14g04370	2.06237	1.61465	1.52705	1.6388	2.29568	1.71035	1.44027	1.53905	1.50287	1.54979	1.54627	1.73118	1	0	PL1
An12g05010	0.272924	0.283879	0.541992	0.578256	0.25179	0.462395	0.330713	0.296625	0.314473	0.320429	0.359358	0.290558	1	0	CE1
An09g03100	5.4264	12.6374	12.1709	15.2714	6.89453	4.62981	2.44851	0.549163	3.81663	5.84886	4.46406	2.97607	1	1	GH13
An04g09700	0.315708	0.274856	0.334796	0.393638	0.29721	0.875447	0.317176	0.31481	0.287615	0.256064	0.271444	0.243759	1	0	GH28
An07g01160	2.36977	0.904165	1.98764	2.43949	13.6327	7.21014	4.2812	8.97477	2.93719	1.92672	5.55174	7.21823	1	1	CBM18-GH16
An08g11070	0.666984	0.462556	0.441783	0.626908	0.590528	0.554944	0.516542	0.537099	0.639604	0.475204	0.540501	0.427613	1	0	GH32
An16g06120	0.607778	0.446113	0.406884	0.403865	0.642141	0.395547	0.377653	0.465365	0.494553	0.295821	0.358391	0.303592	1	1	GH72-CBM43
An04g03170	0.36665	0.592201	0.381461	0.363005	0.292496	0.296654	0.303632	0.297889	0.276611	1.19836	0.390738	0.419453	1	0	GH1
An04g09690	0.31906	0.3052	0.275033	0.318219	0.374979	0.493278	0.334735	0.303888	0.34799	0.283403	0.258773	0.270877	1	0	CE8
An16g02730	1.70866	1.173	1.29291	0.803502	4.81143	1.3788	0.586835	0.569753	2.43161	0.884237	0.504424	0.366489	1	0	GH43
An01g06620	1.02666	1.90399	2.19018	2.14339	1.237	2.2619	2.3637	2.58472	1.33908	2.99198	2.88982	2.87465	1	0	GH78
An16g08090	3.04605	1.45705	0.956021	0.787928	6.22672	2.85239	1.19151	1.33674	3.43907	1.99089	1.43976	1.70134	1	1	GH76
An18g05940	0.301802	0.701678	0.809661	1.11822	0.374415	0.452214	0.448415	0.428175	0.280265	1.07277	0.690463	0.649891	1	0	GH53
An07g04650	1.05515	4.4804	5.11071	4.36356	1.12619	7.40976	9.00485	6.78687	1.61842	7.24554	10.2546	8.19477	0	0	GH17
An02g02540	0.931961	1.10777	1.13448	1.16123	0.967567	1.29451	1.61851	1.83253	0.917356	1.28644	1.81612	3.61905	1	0	CE16
An15g07800	0.257349	0.216192	0.232162	0.231328	0.269598	0.252527	0.237145	0.243649	0.313423	0.223713	0.242977	0.239448	1	1	GH13
An12g05700	0.267575	0.473811	0.509197	0.421063	0.299217	0.403184	0.275923	0.284203	0.258953	0.685031	0.438925	0.316793	0	0	GH78
An01g04760	2.55771	6.63393	7.87519	8.68999	1.91888	4.77964	6.83396	7.63323	3.11357	7.69392	12.4353	9.33107	0	0	GT41
An03g05260	0.400165	0.440839	0.387545	0.38598	0.493926	2.82775	2.14888	1.28597	0.433157	0.346011	0.394285	0.308721	1	0	GH75
An01g11520	0.267362	0.238146	0.250532	0.236442	0.273205	0.293672	0.442372	0.473229	0.29034	0.34303	0.275979	0.262136	1	0	GH28
An09g03300	0.869064	1.06576	2.54428	2.89019	1.41997	2.26304	0.742368	0.725634	0.785259	0.717409	0.765013	0.755005	1	0	GH31
An01g01340	0.236167	0.235089	0.222526	0.223304	0.234983	0.239443	0.232613	0.230282	0.256826	0.244122	0.256547	0.223585	0	0	GH88
An05g02100	0.292967	0.313977	0.259275	0.274082	0.294247	0.319184	0.276989	0.293626	0.312666	0.322603	0.326718	0.339078	1	0	GH13
An06g00360	8.99504	6.4001	1.83189	1.298	11.4974	6.13862	2.43006	1.48077	15.7489	5.124	2.05521	2.24652	1	1	GH76
An07g04930	0.622895	0.815189	0.677059	0.641739	0.763444	0.635183	0.646188	0.659388	0.712314	0.657224	0.549909	0.584518	1	0	GH43
An09g03070	3.69301	1.93904	3.48147	4.03131	6.65222	1.16445	1.06262	0.828332	4.42394	1.90344	2.54957	2.96895	1	0	GH13-GT5
An03g03740	3.58458	10.9382	4.85904	2.5083	3.15366	16.3471	11.213	9.74891	2.83487	14.532	14.3296	5.683	0	0	GH1
An01g06630	0.423911	0.41193	0.36413	0.396045	0.403861	0.478741	0.441441	0.419105	0.407958	0.507346	0.412277	0.368387	1	0	GH2
An16g03720	1.43587	3.04998	3.52069	4.97531	1.21471	1.37226	2.50474	2.30572	1.35877	3.24325	7.5101	9.29461	0	0	CBM48
An07g00240	0.291905	0.282666	0.288962	0.272793	0.265111	0.285512	0.284225	0.292227	0.284852	0.293657	0.267337	0.26357	0	0	GH78
An02g00610	0.498178	0.42707	0.436228	0.456271	0.467474	0.376282	0.392432	0.393076	0.533957	0.452698	0.386236	0.375822	1	0	GH2
An15g01890	3.25497	3.59682	4.06498	4.69697	3.48794	3.95389	4.88754	5.07808	4.14163	4.38633	4.41009	4.01297	0	0	GH3
An03g06740	0.388819	0.436826	0.514362	0.561467	0.41455	0.382068	0.475029	0.540894	0.349235	0.430359	0.533879	0.563596	1	0	GH28
An12g07020	4.02663	2.19361	1.09088	0.966168	5.79946	2.47018	1.43843	0.986243	7.07549	4.14501	3.01589	2.69195	1	0	GT32
An10g00390	0.484562	0.567731	0.468229	0.515112	0.674365	0.520669	0.450029	0.454569	0.519813	0.528305	0.456483	0.559837	1	0	AA8-AA3
An04g06990	5.73214	5.74712	2.14635	1.8703	1.39461	1.79605	0.986977	0.925035	6.37815	4.38851	1.79451	1.203	1	0	GH47
An11g07660	2.51589	1.10297	1.01622	0.819999	1.96701	1.24016	1.09838	1.14241	2.77197	1.26623	1.11914	1.47133	0	0	GH5
An01g09810	0.617955	2.03149	0.932004	0.767329	0.748076	1.0399	1.07303	0.851318	0.66561	0.853185	0.805798	0.82204	0	0	GT4
An11g00680	0.966234	0.720458	0.732963	0.776341	0.664418	0.683406	0.632407	0.7727	0.739662	0.514466	0.804973	0.89857	0	0	GT1
An03g02990	3.81966	3.98826	3.44337	3.59676	5.42547	3.30561	4.26049	4.22215	7.1786	5.78148	7.13269	7.77358	0	0	GT8
An01g09290	4.22562	2.68813	7.67711	8.19912	3.34416	3.53788	4.76118	4.97063	5.39521	4.62472	5.32997	4.90466	0	0	GH37
An07g06430	8.2425	2.55745	2.73858	2.62119	6.1642	1.57634	0.874987	1.14692	9.37113	3.2565	3.48384	3.22746	1	0	GT24
An15g07810	0.314181	0.299178	0.28182	0.266967	0.332329	0.273166	0.283265	0.279897	0.316602	0.279817	0.283648	0.256436	1	0	GH13-GT5
An14g07420	0.359881	0.304614	0.284633	0.290223	0.312808	0.290551	0.282761	0.289958	0.266951	0.232096	0.236246	0.219045	1	0	CBM18-GH18
An14g07390	0.244845	0.24171	0.225009	0.218092	0.239042	0.203028	0.202535	0.203448	0.220434	0.196667	0.197066	0.188348	1	0	GH11
An09g00270	13.6436	2.41245	1.20571	1.03079	7.09094	10.0325	6.11666	3.65815	6.56991	3.02577	0.933734	2.00164	0	0	GH36
An15g04550	0.361109	0.331554	0.252139	0.237363	0.403129	0.33961	0.266977	0.275076	0.678506	0.348838	0.270174	0.23445	1	0	GH11
An14g02170	0.360841	0.339387	0.790623	0.586691	0.358754	0.390927	0.387016	0.394033	0.381966	0.488992	0.388943	0.334535	1	0	CE5
An12g07500	0.321117	0.330379	0.383128	0.340053	0.2816	0.308022	0.325622	0.354065	0.325777	0.454251	0.604558	0.710718	1	0	GH28
An11g04040	0.358834	0.295807	0.321914	0.320438	0.379322	0.334891	0.340336	0.322324	0.311068	0.310072	0.284129	0.284171	1	0	GH28
An02g12450	0.57437	0.618271	0.501701	0.536766	0.529875	0.410347	0.583007	0.593283	0.501591	0.611016	0.551914	0.841771	1	0	GH28
An01g14650	0.719425	0.475448	0.734566	1.59521	0.588424	0.449372	0.518519	0.530279	0.505176	0.401489	0.447093	0.379683	1	0	GH28
An03g02080	0.223246	0.215433	0.205422	0.19797	0.220468	0.206017	0.206451	0.198867	0.195049	0.179433	0.183092	0.196259	1	0	GH28
An06g02070	0.430947	0.369335	0.348909	0.367509	0.377227	0.407266	0.339705	0.346149	0.286128	0.254276	0.237738	0.269666	1	0	GH28
An11g06320	0.27221	0.231534	0.254088	0.239171	0.251866	0.252431	0.254138	0.238144	0.228744	0.216773	0.220795	0.22049	1	0	GH28
An07g01000	0.324216	0.309762	0.274134	0.271145	0.315189	0.26769	0.283931	0.262223	0.27162	0.227422	0.235297	0.223454	1	0	GH28
An11g08700	0.425339	0.333253	0.294784	0.314478	0.37872	0.329605	0.317892	0.344618	0.312793	0.265484	0.282934	0.272703	1	0	GH28
An15g00320	1.30149	1.44447	0.952503	1.17073	2.56214	1.71883	0.695959	0.513243	1.2388	1.55093	1.42282	1.65151	0	0	GH32
An06g02420	0.331286	0.277721	0.251601	0.287091	0.299475	0.274161	0.267125	0.270212	0.264731	0.236997	0.238109	0.253437	0	0	GH32
An11g03200	0.401229	0.293216	0.319178	0.30825	0.380822	0.29239	0.325598	0.313003	0.359698	0.273623	0.289767	0.286497	1	0	GH32
An01g01000	2.63451	14.7985	5.41489	2.14488	1.04989	6.90528	5.93332	3.15094	1.55803	8.46438	4.21214	3.65944	0	0	GT25
An01g01260	0.306748	0.277723	0.282798	0.28608	0.298269	0.285404	0.301944	0.289904	0.285519	0.292509	0.296727	0.281421	1	0	GH2
An01g01320	0.26116	0.301778	0.276704	0.262227	0.252545	0.27219	0.248838	0.270942	0.51757	0.291852	0.274175	0.242478	1	0	GH27
An01g01870	0.301373	0.256361	0.261527	0.259106	0.27443	0.267554	0.260111	0.263732	0.255597	0.238556	0.244893	0.238848	1	0	GH74-CBM1
An01g04880	0.659163	2.13322	1.40178	1.46175	0.686182	1.15503	1.15443	1.0145	0.901008	3.73768	4.20467	2.32999	0	0	GH31
An01g05360	1.03577	7.81694	9.11744	7.77627	1.08096	4.76719	7.20517	6.04163	2.05761	10.8512	12.63	18.6071	1	0	GH18
An01g06120	6.07594	21.6842	12.0977	12.8693	5.27162	9.6895	9.5971	7.6541	3.46376	21.2306	10.8166	8.6974	0	0	GH13
An01g06500	0.389863	2.51707	3.56064	4.81813	0.412557	0.65006	2.23885	3.88447	0.362957	4.05268	7.85788	8.67231	1	A	GH76
An01g08460	0.836318	1.10395	0.902786	0.66552	0.538511	0.775174	0.927252	0.818076	0.684003	1.76551	0.933875	0.904571	1	0	GT22
An01g09110	3.12987	2.68958	3.60662	3.70857	3.2422	3.30334	5.39133	5.85067	3.83183	4.4141	4.73992	5.20836	1	0	GT1
An01g09510	2.23643	1.70416	2.08733	2.38819	2.81419	2.17523	2.59013	2.40592	2.69395	1.52276	1.33491	1.26356	1	0	GT31
An01g09910	1.96675	1.44276	1.9261	1.59349	1.91456	1.36294	1.7068	1.72196	1.91878	1.08497	1.52086	1.50152	0	0	GT4
An01g11670	0.214875	0.219945	0.221955	0.234459	0.221841	1.00753	2.59245	0.513095	0.200981	0.227699	0.22578	0.222834	1	0	GH5-CBM1
An01g11970	0.307794	0.266524	0.272201	0.273402	0.378477	0.303678	0.291073	0.272916	0.651135	0.307475	0.287041	0.249427	0	0	GH16
An01g13340	3.11014	3.22493	1.96413	1.85171	1.66261	1.79846	1.83376	1.68384	1.6909	2.14392	2.82641	3.05926	0	0	CE4
An01g13610	1.05059	0.655899	0.615892	0.65266	1.10651	0.76941	0.749028	0.798116	0.87696	0.623786	0.614379	0.615149	0	0	GH13
An01g14670	0.23022	0.29678	0.259156	0.247885	0.249118	0.266068	0.289736	0.303532	0.253253	0.287676	0.306047	0.282171	1	0	GH28
An02g00140	0.420325	0.826997	0.614321	0.469488	0.459158	0.662198	0.910264	0.896221	0.466117	1.5244	1.25318	1.44063	0	0	GH43
An02g00730	0.327654	0.316178	0.89808	0.661613	0.34363	0.34036	0.333453	0.320134	0.327111	0.50869	0.285479	0.29246	1	0	CE5
An02g01400	0.76891	0.757511	0.710051	0.703571	0.876639	1.43313	1.73837	1.85502	0.941561	0.931498	0.835749	0.91019	1	0	GH43
An02g02340	5.9973	15.079	21.0286	18.1627	8.12108	11.5432	15.5891	14.5005	8.38771	16.1855	21.6687	20.6799	0	0	Myosin_motor-GT2
An02g02360	2.44707	3.90428	4.6177	3.29856	3.73902	3.45052	3.50876	3.016	2.17832	0.844497	2.03255	2.44233	0	0	Myosin_motor-GT2
An02g02660	0.62816	1.06518	0.84015	0.672524	0.501508	0.635454	0.589357	0.587241	0.816649	1.62856	1.0992	1.13649	1	0	GH76
An02g02980	2.10456	0.876782	1.02505	1.00388	2.70756	1.01534	0.988593	1.11387	2.60068	0.980682	1.16142	1.11322	1	0	GT59
An02g03070	0.360857	0.326541	0.313354	0.373805	0.32542	0.350732	0.352429	0.302386	0.275213	0.245218	0.29736	0.303232	1	A	GH72-CBM43
An02g03260	0.274789	0.276578	0.591664	0.413427	0.291286	0.278939	0.262543	0.295429	0.271495	0.357736	0.303023	0.318816	1	0	GH13-GT5
An02g03630	0.304733	0.280619	0.271688	0.279745	0.29674	0.276818	0.287417	0.310507	0.293412	0.244489	0.260753	0.252465	0	0	GT1
An02g03980	0.288393	0.215058	0.759439	1.31124	0.278037	0.22891	0.257323	0.249114	0.275585	0.239095	0.278903	0.312206	0	0	GH16
An02g05260	5.29734	17.3289	28.8277	25.3084	0.68048	0.701707	1.37241	1.12815	1.77524	5.08517	10.6523	6.08223	1	0	CBM21
An02g05730	0.505561	0.487182	0.43091	0.394156	0.46617	0.484477	0.494361	0.420804	0.396349	0.340405	0.368485	0.329351	0	0	GT2
An02g07590	0.972991	3.6266	1.92954	1.48975	0.690732	0.792056	1.05779	1.39381	0.869041	3.13443	2.61479	1.95317	0	0	GH3
An02g07770	1.37911	3.35172	3.55982	4.56542	3.05071	4.06503	7.35586	8.58046	0.814159	2.56374	9.69474	13.5085	0	0	GT4
An02g07960	0.496042	0.51406	0.506652	0.495153	0.522032	0.543186	0.485907	0.447285	0.423799	0.418202	0.411806	0.419994	0	0	GT1
An02g09270	0.353245	0.286996	0.305721	0.320255	0.475531	0.312732	0.295159	0.323332	0.373953	0.282668	0.315787	0.271953	1	0	AA3
An02g09940	6.11534	5.61603	6.91607	7.39852	6.2488	4.77946	7.41492	6.0531	7.08194	4.99342	7.33308	8.25065	1	0	GT15
An02g10310	13.1027	12.1744	12.9087	14.1972	2.04835	5.75421	6.47361	5.5845	7.95897	7.88071	6.22605	5.55521	0	0	GT3
An02g10490	1.75314	1.54641	1.27819	1.5328	1.7675	1.83903	2.98321	4.22381	2.79269	2.17214	4.17018	4.84479	0	0	GH16
An02g11410	2.25805	0.698649	2.05917	2.95879	0.640266	0.533234	0.475651	0.433048	1.68687	0.73278	0.617782	0.524242	0	0	GT4
An02g11560	0.255787	0.3199	0.346218	0.311836	0.253227	0.24654	0.247249	0.268618	0.236576	0.277879	0.246121	0.259617	1	0	AA3
An02g11720	2.10545	25.9952	20.7434	21.974	2.00688	20.1124	18.8951	19.5277	2.06053	14.7207	16.4077	15.9702	0	0	GH38
An02g12630	4.09961	2.12556	2.15474	1.99158	3.56768	1.75377	1.49681	1.63656	3.69161	2.07725	2.05052	1.63198	0	0	GT57
An02g13240	1.44538	3.71612	2.23743	1.5127	1.20607	1.49223	1.73222	1.95187	1.28321	3.25734	3.04614	2.21184	0	0	GH13
An02g13450	8.51336	1.70704	0.491094	0.377681	3.00482	0.532734	0.287876	0.294792	8.50892	1.93499	0.508833	0.431917	0	0	GT69
An02g13520	1.18752	1.64544	2.32928	2.08921	1.24401	1.31243	1.31373	1.33484	0.892514	1.03635	1.48831	1.60445	1	0	GT31
An02g13530	0.345695	0.311936	0.309075	0.302104	0.304325	0.332479	0.332787	0.293251	0.319999	0.290079	0.296195	0.303397	1	0	CE4
An02g14160	0.436821	0.346556	0.279489	0.295815	0.291173	0.306951	0.308238	0.265003	0.486161	0.436705	0.28313	0.238885	0	0	GT69
An03g00130	18.5952	18.7592	6.15854	2.85683	7.47839	10.5615	4.12438	2.22647	12.5434	7.97611	6.27942	8.24552	0	0	GH38
An03g00190	0.627628	0.446103	0.464696	0.390113	0.629876	0.476478	0.433235	0.388546	0.48371	0.4871	0.771793	1.25722	1	0	PL1
An03g00740	0.928312	0.704502	1.02694	1.4964	0.938526	0.798223	0.803969	0.77241	0.79789	0.648445	0.638578	0.667058	1	1	GH76
An03g01090	5.4678	5.23909	4.28903	2.68618	6.51283	1.72337	1.58148	2.34917	12.989	6.04567	6.70556	7.19398	1	0	GT32
An03g02860	0.304089	0.297153	0.36462	1.19164	0.256574	0.252229	0.257211	0.252734	0.264639	0.259926	0.254129	0.25311	0	0	GT32
An03g02880	0.303608	0.345115	0.444809	0.755618	0.305134	0.30645	0.309366	0.303524	0.283698	0.417944	0.371496	0.328319	1	0	GT25
An03g04410	7.08809	4.77501	4.2542	3.88509	5.48346	3.53235	3.99047	4.34823	6.90093	6.32975	5.45203	5.59169	1	0	GT2
An03g05010	2.82479	1.57919	2.03414	2.71639	3.81698	2.27328	2.21239	2.02861	4.20716	2.28487	2.62335	2.15848	1	0	GT62
An03g05330	0.28263	0.287126	0.269656	0.254297	0.307873	0.263989	0.283089	0.259036	0.291931	0.265152	0.244455	0.288908	0	0	GH3
An03g05740	3.85826	0.941982	0.880467	0.714706	4.0915	1.73484	0.744898	0.804969	5.67557	2.01677	5.11592	8.3969	0	0	GT2
An03g06220	0.413333	0.3874	0.457483	0.441037	0.531386	0.396411	0.410673	0.415505	0.439608	0.41658	0.430204	0.458675	1	1	GH72-CBM43
An03g06360	0.305096	0.302402	0.323989	0.307249	0.287323	0.290774	0.289241	0.292752	0.260569	0.282064	0.251727	0.274	0	0	GT2
An04g01260	3.68029	3.7499	4.3011	4.3875	4.4875	3.89199	4.5767	4.36528	4.94241	4.25199	3.55401	2.43018	0	0	GT62
An04g02700	0.421972	0.675864	0.431018	0.389968	0.31348	0.422004	0.320968	0.297089	0.367989	0.817365	0.548078	0.449398	0	0	GH36
An04g04110	1.44461	2.055	2.67371	3.25131	1.21061	2.48584	2.65116	3.23987	1.51882	3.04432	3.88328	4.26537	0	0	GT22
An04g04530	0.445291	0.385776	0.39715	0.368396	0.438078	0.41007	0.361297	0.327685	0.462853	0.424224	0.403925	0.352189	1	0	GH75
An04g04630	1.30527	0.745538	0.719144	0.704094	4.19739	1.81129	1.60806	1.76405	1.73216	1.07276	1.05562	1.34324	1	0	GT69
An04g04670	3.07107	2.99441	1.86627	0.881461	8.87451	3.56439	1.09841	0.784754	3.5765	4.39801	1.89105	1.57216	0	0	GH18
An04g04790	0.712259	0.527643	0.499766	0.563449	0.612725	0.331646	0.230138	0.253899	0.687989	0.378112	0.386075	0.397918	0	0	GT69
An04g05330	1.36578	1.43756	1.39254	1.45953	1.72283	2.19916	2.78963	3.1289	1.28435	1.41671	1.60552	2.40323	0	0	GT76
An04g05940	3.23876	2.76571	2.77582	3.91719	3.61908	3.53015	3.93024	3.76093	2.95411	3.30418	3.90541	4.49701	0	0	GT34
An04g06730	1.68856	0.537527	0.435773	0.407934	0.350633	0.354527	0.355691	0.358184	1.08816	0.433519	0.399577	0.402265	1	0	GT71
An04g06900	1.91019	2.0156	2.44514	2.04098	1.87663	2.43007	2.43022	2.39824	1.69603	0.721537	0.872872	0.987781	1	0	GT31
An04g07110	0.507493	0.383457	0.382136	0.403279	0.462016	0.330583	0.396425	0.342757	0.280456	0.256795	0.253958	0.249493	1	0	CE4
An04g08370	0.715575	0.611576	0.660092	0.653145	0.708081	0.610239	0.562061	0.572917	0.608262	0.408019	0.458468	0.439537	0	0	GT1
An04g08550	0.394568	0.415305	0.33718	0.334302	0.405222	0.327016	0.351428	0.323413	0.347164	0.347184	0.328832	0.303111	1	0	GH61
An04g08820	6.83706	3.04313	3.69391	3.85804	6.17193	2.82681	2.80542	3.04922	5.8909	2.62796	3.30716	2.88983	0	0	GT57
An04g09070	0.550292	0.658574	0.586531	0.66843	0.503284	0.541706	0.608081	0.570201	0.582074	0.718751	0.745288	0.768039	0	0	GH78
An04g09890	1.56914	1.2773	0.776046	0.647385	5.48935	1.28534	0.666528	0.578432	1.69299	0.696878	0.535984	0.538041	1	0	GH13-GT5
An04g10340	0.375924	0.314258	0.278342	0.305131	0.283851	0.278207	0.298911	0.307939	0.284679	0.257664	0.282859	0.259856	0	0	GT1
An05g01750	8.36707	25.9203	6.11865	4.86657	1.49562	16.6032	10.3094	3.40483	7.26859	14.0621	11.0489	4.93751	1	0	GT32
An05g02310	23.4925	12.6647	8.35556	5.13225	27.2294	8.62841	1.4968	1.15944	33.4966	19.1192	19.6419	11.5925	1	0	GT32
An05g02320	6.49112	4.42725	4.31806	2.96063	7.22216	3.09249	1.63901	1.52749	6.34171	3.69183	2.91074	2.52094	1	0	GT32
An05g02330	2.26532	2.36989	2.15507	1.55937	4.15706	3.7961	2.18546	1.76503	3.08211	3.39941	2.286	1.69917	0	0	GT69
An05g02410	0.462263	5.8627	2.5739	2.25453	0.456283	1.83201	1.7947	1.86512	0.342043	1.90761	3.51319	3.33608	0	0	GH2
An05g02440	0.34084	0.326116	0.327493	0.324946	0.347469	0.360731	0.34012	0.365597	0.345286	0.309104	0.326915	0.301525	1	0	GH28
An06g00290	0.525577	0.468681	0.459596	0.438977	0.520472	0.530699	0.656905	0.67217	0.438022	0.505615	0.482143	0.619247	1	0	GH35
An06g00510	0.662854	0.456993	0.467617	0.448355	0.622106	0.58504	0.547574	0.496723	0.519356	0.401302	0.368731	0.478003	1	0	GH71
An06g00810	0.259795	0.23169	0.239373	0.235553	0.249261	0.239066	0.225989	0.231187	0.249131	0.237097	0.235313	0.223344	0	0	GH71-CBM24-CBM24-CBM24
An06g01100	1.53826	0.980324	1.06913	1.00288	1.29118	0.895272	1.40578	1.44697	1.4607	1.03912	1.31929	1.41208	1	0	GT33
An06g01140	0.640469	0.487574	2.27486	4.49079	0.504678	0.445026	0.442954	0.521715	0.46053	0.512294	0.433105	0.434779	0	0	GT1
An06g01510	7.55225	10.3885	11.1979	9.30857	5.007	10.4959	8.74791	7.56092	4.98035	5.51155	6.93245	6.01502	1	0	GH47
An06g01530	0.757529	0.594962	2.00027	3.90556	0.846506	1.02496	0.936491	1.21836	0.582081	0.507818	0.99746	1.2479	1	0	GH17
An06g01550	60.7607	68.2087	73.2027	86.7071	61.9366	64.442	69.6955	62.1066	51.3015	56.3015	59.9839	64.6679	0	0	GT48
An06g02040	0.343311	0.339591	0.319646	0.349331	0.349178	0.338008	0.323304	0.348602	0.346081	0.329914	0.319148	0.321816	0	0	GH3
An06g02060	0.351287	0.343947	0.359532	0.432554	0.346081	0.356081	0.436864	0.467368	0.315841	0.387438	0.426896	0.51619	1	0	GH5
An06g02460	0.230424	0.206615	0.195943	0.202202	0.207495	0.221835	0.217646	0.204075	0.211487	0.205638	0.204169	0.189977	1	0	GH3
An07g00350	0.348885	0.380851	0.327901	0.3159	0.336378	0.384357	0.340135	0.389198	0.336833	0.31427	0.307787	0.305565	1	0	GH31
An07g01110	0.30435	0.260677	0.255928	0.267059	0.280154	0.264908	0.269724	0.280858	0.272934	0.241806	0.271452	0.258212	0	0	GT2
An07g01740	0.542524	0.33869	0.341782	0.381773	0.385259	0.351714	0.353038	0.349628	0.35018	0.279584	0.298085	0.293932	0	0	GT25
An07g01780	0.381738	0.327842	0.366312	0.313667	0.362084	0.333496	0.306354	0.330505	0.296153	0.27669	0.281596	0.290821	0	0	GT34
An07g03100	3.06469	5.90516	10.1303	5.396	2.97425	6.12226	5.49301	4.98663	2.6435	10.3292	13.7126	13.1857	0	0	CE1
An07g03380	2.56556	1.52296	2.14132	1.97993	4.25969	2.19624	2.68249	3.12151	2.8861	1.94059	1.82338	1.7667	0	0	GT21
An07g04420	0.414067	0.357803	0.401412	0.412216	0.378514	0.375606	0.376973	0.409394	0.38053	0.382533	0.439039	0.555977	0	0	GH35
An07g04940	0.852045	0.785013	0.579028	0.817928	0.754662	0.949493	1.12963	1.54476	0.935861	0.555583	0.797368	0.979072	1	0	GT32
An07g05570	2.42161	2.29464	2.21711	2.12889	3.24918	1.76835	1.82293	2.08501	3.03002	3.79089	2.43595	1.84574	0	0	GT2
An07g06610	2.6515	8.4644	7.58661	6.19006	2.28296	6.87983	7.53705	6.87429	3.26905	6.9378	6.48953	5.53978	0	0	GT1
An07g07630	0.689771	0.653362	0.582612	0.588335	0.563491	0.517304	0.62749	0.571587	0.393953	0.351439	0.421827	0.54788	1	0	GH3
An07g08710	6.48223	6.72818	7.10334	4.37473	4.86293	2.5209	2.35789	1.03147	7.02778	7.29635	5.03358	2.85115	0	0	GT20
An07g08720	1.99542	8.9246	8.73103	5.42746	0.950357	1.73871	1.40215	0.719997	0.690301	1.18585	1.41446	1.06789	0	0	GT20
An07g08950	0.308895	0.288923	0.306721	0.288426	0.291503	0.292141	0.296671	0.268798	0.275284	0.240443	0.262437	0.239697	1	0	GH5
An07g09760	0.311058	0.290638	0.300069	0.305053	0.381211	0.328385	0.319857	0.30198	0.282006	0.263273	0.256316	0.266058	1	0	GH3
An07g10350	32.8382	26.9034	27.0982	29.4902	32.2556	25.6568	30.5228	32.3198	21.9601	16.8305	22.3036	25.768	0	0	GT39
An08g01100	2.12663	2.77136	2.69496	2.1055	1.55328	1.68484	1.96885	2.22851	2.15267	2.93689	4.47896	4.91155	1	0	GH5
An08g01440	1.22096	9.0539	1.48304	0.839943	0.571947	0.599641	0.916604	1.0886	4.2552	12.9424	2.6191	1.30341	1	0	CE3
An08g01710	0.403129	5.30412	3.94321	2.45493	0.338593	2.05578	1.89467	1.5714	0.461002	7.37088	4.09272	2.02149	0	0	GH51
An08g01760	0.350882	0.362686	0.293196	0.310607	0.318402	0.352512	0.354331	0.388782	0.281711	0.284311	0.282719	0.28009	1	0	GH6
An08g05290	0.341393	0.609125	0.494984	0.367537	0.325449	0.343144	0.320721	0.31982	0.507599	1.15749	0.589638	0.456882	1	0	GT2
An08g05790	3.50038	71.0007	84.372	79.1546	2.51574	25.0109	42.3946	35.8258	2.92225	59.7883	79.9693	64.003	0	0	GT35
An08g07020	2.05509	1.74509	1.55828	1.641	1.7445	1.26757	1.87614	1.68237	1.72359	1.3634	1.22634	1.42687	0	0	GT22
An08g08240	0.58383	0.427595	0.379452	0.393963	0.537102	0.430554	0.385344	0.386786	0.406603	0.323808	0.306849	0.301339	0	0	GH3
An08g09030	0.439021	0.438003	0.621553	0.741354	0.364204	0.442299	0.420613	0.676557	0.339184	1.04471	5.11256	10.6353	1	0	GH18
An08g09120	0.455069	0.395624	0.376598	0.345695	0.39741	0.346397	0.356253	0.36845	0.335002	0.293422	0.307347	0.332379	0	0	GT1
An08g09140	0.305382	0.302726	0.278556	0.272061	0.300191	0.303796	0.272269	0.297999	0.309826	0.262306	0.301908	0.287669	1	0	GH78
An08g09990	0.256637	0.261565	0.251099	0.259693	0.264045	0.224222	0.218517	0.22535	0.228435	0.220777	0.219733	0.215253	0	0	GT2
An08g10510	4.02811	9.99385	10.4948	10.0672	3.98662	5.99107	7.05573	6.45355	4.34398	8.84859	10.6806	10.9867	0	0	GT20
An09g00100	0.315267	0.320121	0.293137	0.331447	0.338928	0.348966	0.31536	0.299267	0.343454	0.276246	0.287148	0.281419	0	0	GT32
An09g00790	0.382579	0.409919	0.383478	0.380214	0.40187	0.447942	0.384128	0.390159	0.363021	0.338416	0.345312	0.298689	1	0	CE5
An09g00880	0.411973	0.335371	0.31468	0.329034	0.416821	0.31472	0.340007	0.30997	0.329445	0.283038	0.281826	0.30357	1	1	GH51
An09g01010	0.59545	0.433909	0.465241	0.466765	0.659515	0.516222	0.492617	0.487117	0.538263	0.448305	0.437771	0.411021	0	0	CE5
An09g01560	1.86874	1.08154	1.58435	1.99384	2.88748	1.29368	1.34682	1.50157	1.60613	1.07235	1.23693	1.4131	1	0	GT31
An09g02290	3.43196	8.11717	8.95619	7.713	2.07332	7.18688	6.0575	5.56884	2.49447	6.93589	5.62877	4.70708	0	0	GT2
An09g03110	0.462445	0.268541	0.249878	0.273317	1.29094	0.351256	0.293183	0.28931	0.832268	0.314644	0.370944	0.282028	0	0	GH13
An09g04010	6.69696	14.6628	14.457	15.102	3.92151	9.88252	8.97039	8.28393	8.42548	13.2938	9.56552	6.5054	0	0	GT2
An09g05880	15.4332	9.09213	10.0882	10.6703	9.63255	5.54114	6.05455	5.48881	10.7171	9.38525	7.54763	6.10978	1	0	GH31
An09g06260	2.55413	1.58433	1.99505	2.90858	2.40571	1.50014	1.18038	1.15018	2.80925	2.38751	3.75181	4.33025	1	0	GH71
An09g06340	2.73626	3.31257	2.67928	2.15912	2.70835	3.60973	5.87776	5.83359	4.09433	5.06171	3.53284	3.92748	0	0	GH18
An10g00290	0.317201	0.242789	0.264597	0.301872	0.308602	0.245943	0.281147	0.329616	0.273535	0.259134	0.250005	0.28632	1	0	GH78
An10g00870	0.359041	0.321334	0.313723	0.298437	0.326028	0.288999	0.272776	0.284367	0.295555	0.266501	0.270801	0.299977	1	0	PL1
An11g00110	0.33008	0.314303	0.346404	0.315675	0.316565	0.317924	0.27403	0.332238	0.261973	0.27809	0.252894	0.249277	1	0	CE5
An11g00390	0.344035	0.354632	0.375775	0.361818	0.337536	0.294736	0.302021	0.357271	0.276242	0.352927	0.285782	0.301623	1	0	PL4
An11g00920	0.536097	0.785367	0.849732	0.938997	0.545729	0.631833	0.667537	0.755064	0.534241	0.657509	0.994115	1.03344	1	0	CBM18-CE4-CBM18
An11g01160	0.440329	0.34035	0.341704	0.374357	0.364189	0.338004	0.397932	0.405793	0.321663	0.271422	0.264672	0.248421	0	0	GH18
An11g01240	2.11748	1.17137	0.525167	0.491942	0.460885	0.551689	0.501695	0.4307	5.72381	3.27077	0.977947	0.468408	0	0	GH76
An11g02090	4.11413	2.13595	1.58199	2.30756	2.97945	1.18846	0.761541	0.806523	4.4284	1.55614	0.857438	1.08895	0	0	GT25
An11g02100	0.277001	0.378069	0.557886	1.41316	0.320198	0.371127	0.569873	0.515211	0.314283	0.644312	0.418752	0.409059	1	0	GH1
An11g03210	0.535838	0.449383	0.438255	0.467347	0.464081	0.430557	0.422005	0.42967	0.365448	0.308192	0.339168	0.295216	0	0	GH32
An11g04030	0.276996	0.234413	0.249156	0.236	0.272556	0.245171	0.269421	0.245361	0.265378	0.241567	0.262792	0.239173	1	0	PL1
An11g05580	0.270207	0.242833	0.232641	0.224564	0.271249	0.25397	0.260523	0.265777	0.270724	0.201201	0.216887	0.219883	1	0	AA3
An11g05600	0.887032	7.23148	1.25581	0.579166	0.342704	0.344429	0.392579	0.36317	11.0219	14.0736	16.2405	6.24514	1	0	AA3
An11g05860	0.234643	0.237582	0.219295	0.243711	0.227804	0.244998	0.220575	0.242334	0.213194	0.20796	0.215001	0.226669	0	0	GH18
An11g06330	0.566268	0.545508	0.399951	0.460584	0.475092	0.428553	0.406318	0.427049	0.404003	0.425646	0.326119	0.338215	1	0	GH27
An11g07490	0.242005	0.477147	0.456025	0.319446	0.446054	0.847541	0.511023	0.345134	0.269559	0.333538	0.295733	0.263642	1	0	GT32
An11g09030	0.299701	0.289757	0.288729	0.285162	0.301657	0.282351	0.299013	0.306817	0.268044	0.247575	0.256347	0.268331	1	0	GT1
An11g09890	6.44464	3.70327	3.38789	3.43723	5.06626	2.71554	2.47181	2.7289	6.52548	3.26899	3.50552	3.47142	0	0	GT39
An11g10260	2.26409	6.59038	4.28567	2.05446	1.3573	3.40831	4.66382	2.09959	1.45455	8.93787	4.39294	1.69273	1	0	GT8
An11g10610	2.22935	1.75633	1.52313	1.73175	3.05884	2.11596	2.17038	2.33769	2.69614	2.20035	1.74032	2.40905	0	0	GT8
An11g10990	10.2869	5.29121	6.21779	6.74036	9.67471	6.30963	5.88429	5.50424	10.2619	4.55425	5.77716	6.34296	0	0	GT20
An12g00100	7.46045	7.39884	8.80168	6.63085	1.37658	2.27284	6.75695	5.08083	3.36968	3.78339	3.66797	4.19717	1	0	GT2
An12g00340	1.40811	1.60826	2.01631	2.17735	1.02582	1.17988	1.65839	1.64307	1.41112	1.95802	1.81065	1.68155	1	0	GH47
An12g00950	0.319827	0.350702	0.385953	0.421654	0.424851	0.761312	0.954341	0.901688	0.50054	0.580158	0.73753	0.760465	1	0	GH28
An12g01800	0.389263	0.34952	0.325724	0.318867	0.387564	0.332204	0.373691	0.341575	0.294949	0.296102	0.29316	0.266262	1	0	GH71-CBM24-CBM24-CBM24
An12g01850	0.902631	6.17615	3.90783	5.03019	0.792688	3.67829	3.4347	4.7441	0.964989	6.7736	5.7109	6.3912	0	0	GH2
An12g01880	0.930234	0.908091	0.947005	0.806753	1.04718	0.909427	0.859838	0.829727	0.964945	0.861325	0.849886	0.714247	1	0	GT50
An12g02220	0.326323	0.332621	0.283174	0.289303	0.359762	0.337545	0.36183	0.388931	0.319399	0.286402	0.30045	0.326071	1	0	CBM1-GH6
An12g02450	2.10327	1.22638	0.541687	0.521494	0.975399	0.435658	0.301939	0.334731	0.833336	0.638466	0.352949	0.303332	1	0	GH13-GT5
An12g02460	4.90273	3.26164	1.09355	1.04621	2.75523	1.21268	0.650476	0.65212	2.24163	1.47826	0.548376	0.486445	1	1	GH13
An12g02540	0.379244	0.369437	0.32888	0.340577	0.340099	0.354205	0.331836	0.334991	0.353844	0.313516	0.288968	0.280069	1	0	GH61
An12g02550	0.28089	0.28781	0.281118	0.275202	0.247268	0.27027	0.258156	0.261185	0.245574	0.245495	0.264871	0.258044	1	0	CE1
An12g03070	0.221625	0.244693	0.285157	0.322007	0.245914	0.261084	0.283116	0.364789	0.247858	0.25708	0.479004	0.756799	0	0	GH15
An12g04480	0.274861	0.234241	0.234761	0.237613	0.249044	0.256248	0.248418	0.299497	0.222006	0.192806	0.224009	0.215756	1	0	CE4
An12g04610	0.86925	0.722416	0.72325	0.698242	0.791987	0.669274	0.685856	0.626856	0.718159	0.56603	0.574929	0.601204	1	0	GH61
An12g05330	0.412155	0.298663	0.309969	0.347738	0.373104	0.304783	0.351381	0.287973	0.229432	0.242612	0.232104	0.205756	0	0	CBM18-GH18
An12g05930	0.63145	0.444266	0.46581	0.473427	0.615948	0.502871	0.490095	0.489958	0.567132	0.417137	0.403224	0.386994	0	0	GH76
An12g08720	3.84806	2.02946	2.47058	2.84528	3.67602	1.9498	1.84379	1.83009	3.49407	1.07456	1.3961	1.32672	1	0	GT31
An12g09860	0.570879	2.03456	0.521919	0.408951	0.356488	0.469213	0.360743	0.341748	0.370189	1.23662	0.32752	0.30045	0	0	GT25
An12g10160	1.27048	1.4053	1.41811	1.43749	1.4196	1.38339	1.51809	1.55621	1.27515	1.50599	1.32506	1.28996	1	0	GT31
An12g10380	22.4592	5.00573	2.68443	2.31728	30.5433	8.09388	1.81405	1.843	20.1863	5.42248	1.96892	1.68855	0	0	GT2
An12g10440	0.742107	1.52703	0.678794	0.55988	0.580468	0.607258	0.76791	0.499965	1.27152	0.784401	0.775875	0.452631	1	0	GT4
An13g00400	0.944226	1.21812	1.1287	1.47793	1.16547	1.30226	1.2774	1.28379	1.11829	2.24278	3.52249	4.38658	1	0	GT20
An13g03710	0.397985	0.459163	0.329926	0.338826	0.435434	0.318787	0.343759	0.334696	0.37982	0.477103	0.417736	0.38893	0	0	GH13
An14g00660	5.37442	4.63037	3.98223	4.51796	3.35097	1.58914	0.46491	0.465007	4.61685	2.18559	1.34387	0.999453	0	0	GT2
An14g01130	0.263757	0.224552	0.234947	0.236626	0.259907	0.234541	0.227007	0.227015	0.232657	0.195796	0.196419	0.199034	1	0	PL4
An14g01330	0.286461	0.274387	0.256897	0.281717	0.273857	0.290859	0.259547	0.261724	0.242329	0.248823	0.275201	0.355457	1	0	GH79
An14g01770	1.06028	1.67075	1.76498	1.66871	1.02323	10.2609	4.07094	2.62089	0.747942	1.27685	1.33723	1.2434	1	0	GH3
An14g02180	0.540586	0.760884	1.34211	3.54787	0.744157	1.0789	1.57798	1.78558	0.708651	2.05187	9.12811	21.372	0	0	GT20
An14g02920	0.373427	0.798969	0.557833	0.508211	0.348329	0.544875	0.480627	0.63803	0.425934	1.49992	0.886051	0.617256	0	0	GH105
An14g03910	6.52184	5.83618	6.33184	6.035	9.08318	5.35119	4.31609	5.29022	11.0145	10.4781	10.5828	8.79517	1	0	GT15
An14g04190	10.8749	42.5564	23.696	22.0517	2.18288	7.17913	9.51871	8.36053	4.05593	23.1522	21.6235	13.325	0	0	CBM48-GH13
An14g05490	0.270065	0.321052	0.273946	0.261013	0.267779	0.28544	0.262689	0.280479	0.299905	0.298425	0.263696	0.251163	1	0	GH16
An14g05800	0.810117	1.0987	1.48872	1.25305	0.78072	0.800265	1.03786	1.17885	0.715165	1.36147	1.26435	0.686014	1	0	GH67
An14g05820	0.501946	0.613465	0.715745	0.703664	0.571214	0.487807	0.510526	0.527165	0.489224	1.09014	0.683732	0.427816	1	0	GH35
An14g05910	3.67026	1.31563	1.38728	1.50694	2.30487	1.17066	1.65103	2.07829	4.52301	2.29421	2.91091	2.82616	0	0	GT4
An14g06060	1.8182	1.84774	1.37118	1.29138	1.80107	2.262	1.60936	1.80722	1.79534	2.34938	1.71387	1.81842	1	0	GT71
An14g07140	0.59948	0.483828	0.411356	0.459406	0.724734	0.463094	0.483918	0.481167	0.458992	0.359004	0.338933	0.35696	1	0	GT32
An15g00630	4.54038	3.22412	3.38906	2.81002	5.30288	2.34761	2.16566	2.21315	2.68576	1.41429	1.67342	1.77402	1	0	GT32
An15g00840	0.265903	0.245105	0.232985	0.252314	0.252508	0.265978	0.239866	0.276511	0.237801	0.208878	0.225289	0.22304	1	0	CBM18-GH18
An15g00910	1.29795	1.15805	1.32752	1.31754	1.69903	1.38468	1.61697	1.64404	1.26655	0.804551	1.13845	1.26054	0	0	CBM48
An15g00920	0.541224	0.431306	0.542046	0.474397	0.536492	0.418795	0.451487	0.463711	0.43447	0.323463	0.378747	0.421003	1	0	GT71
An15g01420	11.3189	3.16834	4.13969	4.36569	6.60094	1.89011	1.81533	2.24527	6.11638	3.30346	3.36234	3.16982	1	0	GH63
An15g02570	0.259419	0.217455	0.202599	0.209085	0.239178	0.241557	0.206951	0.232586	0.235306	0.201878	0.206414	0.202758	0	0	CBM18-CBM18
An15g03330	0.732927	1.39466	2.41092	4.08427	1.11107	1.05801	1.36681	1.09098	0.958853	2.28134	2.56626	2.69407	0	0	GT34
An15g04260	0.335907	0.322497	0.346565	0.357316	0.367013	0.423135	0.533226	1.05683	0.313031	0.456581	0.338892	0.328052	0	0	GH33
An15g04530	0.279587	0.2257	0.246407	0.243737	0.272031	0.232391	0.212838	0.216411	0.255384	0.193283	0.198353	0.200653	0	0	GH78
An15g04570	0.515299	0.511811	0.448955	0.418907	0.593478	0.517248	0.494204	0.519676	0.670366	0.461225	0.415237	0.364876	1	0	GH61-CBM1
An15g04760	0.290666	0.26137	0.85521	0.438033	0.300989	0.287704	0.293851	0.300305	0.318517	0.479289	0.557179	0.570407	1	0	GH71
An15g04800	0.294501	0.288115	0.300823	0.268579	0.362723	0.318265	0.284951	0.280184	0.328987	0.337039	0.306179	0.29792	1	0	GH3
An15g04810	6.75007	4.88961	3.29627	1.71314	11.5773	6.40336	3.67259	2.53617	10.4636	6.88071	3.55089	2.24754	1	0	GT71
An15g04860	0.27691	0.231822	0.263077	0.250371	0.30829	0.252434	0.263938	0.264247	0.261564	0.244988	0.243708	0.259373	0	0	GT1
An15g04900	1.99896	1.32874	1.15087	1.26152	1.63836	1.48627	1.60371	1.55014	1.34074	0.971081	1.11809	1.43369	1	0	GH61-CBM1
An15g05350	0.409575	0.36034	0.395686	0.344649	0.365546	0.371418	0.324114	0.299444	0.369733	0.314191	0.292257	0.273415	1	0	GH16
An15g06230	1.30128	0.952355	1.73844	1.6917	2.05543	1.50181	1.81533	2.08729	2.22749	1.77292	2.49645	3.13042	0	0	GT62
An15g07160	2.72085	2.33633	3.36459	4.24177	2.36513	2.40484	2.22522	2.22259	1.94642	2.7461	3.15691	4.3324	1	0	PL1
An15g07370	0.304554	0.29294	2.18237	7.38383	0.321204	0.27613	0.277313	0.281767	0.280727	0.278823	0.323898	0.315629	1	0	CBM14
An15g07760	0.353817	0.28507	0.256118	0.295347	0.33346	0.288777	0.327333	0.280071	0.289701	0.24396	0.233454	0.230081	1	0	GH26
An16g00540	0.26704	0.247199	0.24462	0.240786	0.279228	0.240288	0.252589	0.255661	0.275386	0.21813	0.233802	0.21804	1	0	GH95
An16g02100	4.30882	7.26868	7.09263	7.4724	4.49125	5.11946	5.06091	4.9372	3.54454	11.4572	10.1778	12.7934	0	0	GH5
An16g02760	0.377338	1.38918	1.82749	1.27621	0.328828	1.36757	1.85589	1.91354	0.302928	1.87095	2.30928	2.54398	1	0	GH95
An16g02850	1.15198	0.842611	3.65842	2.45178	3.09632	1.07523	1.30176	1.50195	1.16998	0.932955	1.11596	0.863703	1	0	GH16
An16g02910	0.520022	16.6503	9.12599	6.62598	0.461646	2.64301	0.498338	0.402876	0.407064	13.2652	4.99833	2.45496	1	0	GH92
An16g04330	7.19817	5.12844	6.77996	6.91243	7.77717	6.25525	10.348	12.2681	9.43655	7.68902	7.9886	9.27112	0	0	GT2
An16g05970	1.0274	0.671167	0.585392	0.48511	4.81345	1.25027	0.879469	0.853953	4.25173	1.023	0.916119	1.03283	1	0	GT1
An16g06590	0.266428	0.301896	0.29969	0.281545	0.25283	0.270399	0.242769	0.266653	0.24373	0.250678	0.24901	0.242957	0	0	GH53
An16g08490	12.7016	10.2473	11.5354	10.0197	9.24197	8.62263	8.77705	9.40969	7.58561	5.88889	6.47981	6.39641	0	0	GT39
An16g08570	22.1461	5.57133	6.93405	7.54194	15.1505	4.59964	3.87943	3.69808	16.7692	5.39857	4.78243	6.00706	1	0	GT66
An16g09040	0.592779	5.78218	7.54064	10.3092	0.513037	6.54966	8.37308	9.52437	0.613603	5.35222	10.0071	11.1956	0	0	CE9
An16g09090	0.580914	0.843893	1.69207	3.08045	0.835613	1.06164	1.55318	1.98937	0.688232	1.44531	3.42785	5.27422	0	0	GH3
An17g00300	1.34094	1.40658	1.094	0.905943	1.2174	1.08425	0.974872	0.980543	1.29692	2.0011	1.25371	0.872913	1	0	GH3
An17g00520	0.536073	0.491582	0.458612	0.530332	0.512657	0.426457	0.366591	0.371977	0.569706	0.693684	0.661614	0.5254	0	0	GH3
An18g00730	57.1893	20.9351	3.55986	1.58271	3.67261	1.40225	0.913096	1.02644	58.9851	20.2262	2.14967	0.777835	1	0	GT69
An18g01410	0.623725	0.594239	1.34098	2.47414	0.67583	0.636098	0.581703	0.541653	0.650751	0.538616	0.644593	0.554567	1	0	GH76
An18g01640	0.381279	0.35675	0.34353	0.384995	0.385734	0.381913	0.39415	0.349755	0.338669	0.331006	0.331819	0.323524	0	0	GT4
An18g02170	9.02009	8.86816	10.0075	9.6631	9.43962	8.52501	7.60974	8.96027	8.81752	6.52833	6.56522	5.75877	0	0	GT15
An18g02360	2.62644	0.761147	1.16984	1.38413	2.20932	0.807391	0.813818	0.921767	2.53354	0.751195	1.07765	1.24152	0	0	GT58
An18g04420	1.39499	2.02439	1.48633	1.17757	0.586266	0.892638	0.954732	1.06893	0.699479	1.10903	1.30222	1.37736	0	0	GT8
An18g04560	0.427244	0.356352	0.36035	0.425262	0.418862	0.38062	0.444456	0.380984	0.456899	0.304084	0.362221	0.38495	1	0	CE4
An18g04800	0.786826	0.58144	0.643301	0.678128	1.00325	1.14146	1.12598	1.20736	1.83465	1.52669	1.38382	1.38211	1	0	GH78
An18g05620	0.362905	0.380781	0.450251	0.419784	0.396673	0.493148	0.399714	0.388468	0.313657	0.447258	0.79818	0.550453	0	0	GH31
An18g05910	2.75893	3.28316	3.82331	3.76136	2.48477	2.7252	3.27507	3.40334	2.22795	3.56357	3.5173	3.51159	1	0	GT4
An18g06220	1.98811	0.67306	0.649409	0.781466	1.55992	0.640654	0.610753	0.469043	2.25917	0.57001	0.614444	0.492874	0	0	GH47
An19g00090	0.331413	0.261585	0.286634	0.319176	0.29399	0.268906	0.254091	0.268217	0.338094	0.246359	0.268309	0.25589	1	0	GH55
An19g00100	0.442714	0.341263	0.361531	0.361866	0.389559	0.390399	0.365577	0.329498	0.376954	0.336082	0.326239	0.30944	1	0	CBM18-CBM18-CBM18-GH18
An19g00270	0.237274	0.210694	0.230671	0.205766	0.257688	0.212737	0.205839	0.203139	0.200983	0.187733	0.197546	0.188709	1	0	PL1
An07g08940	0.502753	0.710407	0.722134	0.735905	0.530863	1.2896	0.88655	0.818962	0.470852	0.527517	0.569043	0.686993	1	0	CE16
An12g06930	0.269584	0.272158	0.26464	0.273375	0.295162	0.299676	0.2789	0.317219	0.284792	0.307927	0.320007	0.307071	1	0	GH13
An02g11360	6.70751	3.14182	7.59671	4.48423	5.32873	3.91771	3.4545	1.61901	8.45108	6.6381	5.8869	4.08818	1	0	GH114
An08g04330	0.321403	0.29336	0.278884	0.279642	0.330096	0.308881	0.35209	0.328762	0.320149	0.272583	0.288586	0.271281	1	0	GH114
An07g04010	2.57093	2.87601	1.98408	1.44671	2.84424	1.33307	0.703289	0.660896	2.62817	1.85956	0.939637	0.622403	1	0	GT8
An16g09050	1.49274	3.68471	11.0942	12.2814	1.01878	5.49502	4.55341	4.5956	0.943979	3.86643	11.1667	13.516	0	0	AA3
An18g04440	1.27402	1.01866	0.887778	0.599274	1.12002	0.606733	0.319119	0.298148	1.65227	1.25177	0.823579	0.648102	1	0	GT90
An01g04570	2.7464	3.78724	4.74257	6.56187	2.15597	1.50444	1.81215	2.13781	2.28277	3.67639	2.94748	2.41668	0	0	GT90
An01g02730	0.542902	0.44775	0.430757	0.412137	0.463283	0.454455	0.404857	0.374277	0.380678	0.49885	0.406572	0.346926	1	0	CBM50-CBM50
An02g02790	0.447724	0.494033	0.40084	0.325613	0.41863	0.367549	0.357671	0.389286	0.465158	0.794296	1.51514	0.855623	0	0	GT90
An01g12020	0.311036	0.242647	0.24546	0.259177	0.450268	0.263327	0.252571	0.291625	0.504019	0.228132	0.227335	0.222162	0	0	GT2
An04g09400	0.431987	0.337582	0.37573	0.385121	0.395598	0.350043	0.334399	0.32489	0.347941	0.353751	0.36777	0.334961	0	0	GT2
An09g05170	0.938108	10.0105	27.874	32.188	2.2239	23.9129	12.684	8.44627	1.00088	8.11361	6.13071	1.77634	1	0	AA11
An15g02350	0.866357	0.728043	51.8601	146.999	0.678769	0.591819	0.519799	0.565253	0.622956	0.555765	0.493154	0.518021	1	0	AA11
a	Exp; exponential growth, Day 1,3 or 6: carbon starvation day 1, 3, 6
b	SP: predicted signal peptide presence (1) or absence (0)
c	GPI: predicted GPI-anchor presence (1), absence (0) or ambivalence (A)
